# Supplementary material for: Micro-CT and Microscopy Study of Internal and Marginal Gap to Tooth Surface of Crenelated versus Conventional Dental Indirect Veneers
Source: MDPI journal article supplement (doi:10.3390/medicina57080772), 2021-07-29
Supplement: s1 [file s1]

**Supplemental Material 1.** Marginal gap evaluation using optical microscopy, of the width interfaces  $w$  of each surface and segment of each sample of the two considered groups: Group 1, conventional veneers (CO) and Group 2, crenelated veneers (CR).

| Sample | Surface  | Mean value of the interface width $w$ ( $\mu\text{m}$ ) of each segment |                                     |
|--------|----------|-------------------------------------------------------------------------|-------------------------------------|
|        |          | Group 1, classical veneers (CO)                                         | Group 2, crenelated veneers (CR)    |
| 1      | Incisal  | mesial 160; middle 90; distal 170                                       | mesial 50; middle 60; distal 40     |
|        | Cervical | mesial 180; middle 210; distal 190                                      | mesial 60; middle 40; distal 40     |
|        | Mesial   | incisal 160; middle 220; cervical 210                                   | incisal 20; middle 40; cervical 90  |
|        | Distal   | incisal 190; middle 220; cervical 230                                   | incisal 80; middle 90; cervical 100 |
| 2      | Incisal  | mesial 140; middle 180; distal 140                                      | mesial 100; middle 80; distal 60    |
|        | Cervical | mesial 40; middle 110; distal 90                                        | mesial 80; middle 30; distal 80     |
|        | Mesial   | incisal 120; middle 140; cervical 150                                   | incisal 30; middle 30; cervical 40  |
|        | Distal   | incisal 230; middle 190; cervical 340                                   | incisal 80; middle 30; cervical 50  |
| 3      | Incisal  | mesial 140; middle 80; distal 80                                        | mesial 180; middle 140; distal 140  |
|        | Cervical | mesial 120; middle 130; distal 170                                      | mesial 40; middle 60; distal 40     |
|        | Mesial   | incisal 180; middle 200; cervical 80                                    | incisal 80; middle 80; cervical 80  |
|        | Distal   | incisal 140; middle 90; cervical 240                                    | incisal 100; middle 40; cervical 80 |
| 4      | Incisal  | mesial 160; middle 130; distal 140                                      | mesial 80; middle 60; distal 60     |
|        | Cervical | mesial 100; middle 120; distal 80                                       | mesial 60; middle 70; distal 80     |
|        | Mesial   | incisal 150; middle 170; cervical 100                                   | incisal 40; middle 30; cervical 50  |
|        | Distal   | incisal 180; middle 110; cervical 280                                   | incisal 50; middle 40; cervical 80  |
| 5      | Incisal  | mesial 170; middle 200; distal 230                                      | mesial 80; middle 60; distal 50     |
|        | Cervical | mesial 320; middle 290; distal 330                                      | mesial 70; middle 70; distal 90     |
|        | Mesial   | incisal 180; middle 210; cervical 270                                   | incisal 100; middle 90; cervical 90 |
|        | Distal   | incisal 200; middle 230; cervical 300                                   | incisal 80; middle 70; cervical 60  |
| 6      | Incisal  | mesial 160; middle 140; distal 190                                      | mesial 80; middle 70; distal 90     |
|        | Cervical | mesial 210; middle 240; distal 260                                      | mesial 100; middle 70; distal 90    |
|        | Mesial   | incisal 150; middle 180; cervical 210                                   | incisal 50; middle 30; cervical 40  |
|        | Distal   | incisal 180; middle 200; cervical 220                                   | incisal 40; middle 40; cervical 30  |
| 7      | Incisal  | mesial 250; middle 230; distal 290                                      | mesial 70; middle 90; distal 90     |
|        | Cervical | mesial 310; middle 270; distal 240                                      | mesial 70; middle 80; distal 80     |
|        | Mesial   | incisal 190; middle 230; cervical 210                                   | incisal 40; middle 30; cervical 40  |
|        | Distal   | incisal 210; middle 250; cervical 230                                   | incisal 30; middle 30; cervical 40  |
| 8      | Incisal  | mesial 190; middle 170; distal 220                                      | mesial 50; middle 70; distal 70     |
|        | Cervical | mesial 290; middle 250; distal 280                                      | mesial 60; middle 50; distal 40     |
|        | Mesial   | incisal 330; middle 310; cervical 290                                   | incisal 40; middle 30; cervical 30  |
|        | Distal   | incisal 380; middle 310; cervical 350                                   | incisal 50; middle 30; cervical 50  |
| 9      | Incisal  | mesial 260; middle 200; distal 240                                      | mesial 100; middle 80; distal 90    |
|        | Cervical | mesial 290; middle 260; distal 230                                      | mesial 110; middle 90; distal 80    |
|        | Mesial   | incisal 280; middle 240; cervical 300                                   | incisal 70; middle 60; cervical 60  |
|        | Distal   | incisal 320; middle 290; cervical 310                                   | incisal 70; middle 50; cervical 60  |

|           |          |                                       |                                    |
|-----------|----------|---------------------------------------|------------------------------------|
| <b>10</b> | Incisal  | mesial 420; middle 380; distal 430    | mesial 60; middle 80; distal 70    |
|           | Cervical | mesial 440; middle 390; distal 410    | mesial 80; middle 70; distal 90    |
|           | Mesial   | incisal 390; middle 350; cervical 410 | incisal 50; middle 30; cervical 30 |
|           | Distal   | incisal 400; middle 370; cervical 410 | incisal 40; middle 40; cervical 40 |
| <b>11</b> | Incisal  | mesial 330; middle 290; distal 290    | mesial 90 middle 70; distal 60     |
|           | Cervical | mesial 350; middle 300; distal 310    | mesial 80; middle 60; distal 40    |
|           | Mesial   | incisal 370; middle 350; cervical 390 | incisal 30; middle 40; cervical 50 |
|           | Distal   | incisal 380; middle 340; cervical 400 | incisal 40; middle 50; cervical 50 |
| <b>12</b> | Incisal  | mesial 210; middle 190; distal 220    | mesial 100; middle 120; distal 110 |
|           | Cervical | mesial 220; middle 180; distal 240    | mesial 90; middle 110; distal 100  |
|           | Mesial   | incisal 280; middle 210; cervical 230 | incisal 50; middle 70; cervical 50 |
|           | Distal   | incisal 290; middle 250; cervical 310 | incisal 60; middle 40; cervical 50 |
