# Supplementary material for: Micro-CT and Microscopy Study of Internal and Marginal Gap to Tooth Surface of Crenelated versus Conventional Dental Indirect Veneers
Source: MDPI journal article supplement (doi:10.3390/medicina57080772), 2021-07-29
Supplement: s1 [file s1]

**Supplemental Material 2.** Results of the cement thickness analysis performed for the twelve samples of CO veneers versus the twelve samples of CR veneers, displayed in percentages of the total covered prepared surface area.

| Sample of each group | Intervals of cement width $w$ ( $\mu\text{m}$ ) | Covered area of the surface $S$ (%) |                     |
|----------------------|-------------------------------------------------|-------------------------------------|---------------------|
|                      |                                                 | Group 1, CO veneers                 | Group 2, CR veneers |
| 1                    | 0 – 120                                         | 74.14                               | 83.49               |
|                      | 120 – 400                                       | 25.95                               | 14.86               |
| 2                    | 0 – 120                                         | 46.08                               | 71.48               |
|                      | 120 – 400                                       | 54.02                               | 28.67               |
| 3                    | 0 – 120                                         | 77.06                               | 75.46               |
|                      | 120 – 400                                       | 22.94                               | 24.60               |
| 4                    | 0 – 120                                         | 65.89                               | 81.98               |
|                      | 120 – 400                                       | 34.11                               | 18.02               |
| 5                    | 0 – 120                                         | 73.59                               | 85.05               |
|                      | 120 – 400                                       | 26.41                               | 14.95               |
| 6                    | 0 – 120                                         | 59.63                               | 79.84               |
|                      | 120 – 400                                       | 40.37                               | 20.16               |
| 7                    | 0 – 120                                         | 63.78                               | 88.20               |
|                      | 120 – 400                                       | 36.22                               | 11.80               |
| 8                    | 0 – 120                                         | 49.30                               | 84.63               |
|                      | 120 – 400                                       | 50.70                               | 15.37               |
| 9                    | 0 – 120                                         | 68.48                               | 80.19               |
|                      | 120 – 400                                       | 31.52                               | 19.81               |
| 10                   | 0 – 120                                         | 59.41                               | 82.79               |
|                      | 120 – 400                                       | 40.59                               | 17.21               |
| 11                   | 0 – 120                                         | 72.83                               | 85.73               |
|                      | 120 – 400                                       | 27.17                               | 14.27               |
| 12                   | 0 – 120                                         | 64.51                               | 79.96               |
|                      | 120 – 400                                       | 35.49                               | 20.04               |
